# Supplementary material
Source: PubMed Central journal article supplement (PMC4989215)
Supplement: ejhg20165x3.pdf [file ejhg20165x3.pdf]

**Supplemental Table 1. High throughput sequencing, mapping and variant calling statistics**

|                                                                | <b>Patient 2-III-12</b> | <b>Patient 2-III-13</b> | <b>Healthy brother</b> | <b>Healthy sister</b> | <b>Father</b> | <b>Mother</b> |
|----------------------------------------------------------------|-------------------------|-------------------------|------------------------|-----------------------|---------------|---------------|
| Number of reads                                                | 31762456                | 41166167                | 35706401               | 35448194              | 24878776      | 34803835      |
| pairs                                                          |                         |                         | pairs                  | pairs                 | pairs         | pairs         |
| 63524912                                                       |                         | 82332334                | 71412802               | 70896388              | 49757552      | 69607670      |
| reads                                                          |                         | reads                   | reads                  | reads                 | reads         | reads         |
| Number of mapped reads                                         | 62807584                | 81380112                | 70507082               | 69804206              | 49133972      | 68797164      |
| properly mapped reads                                          | 61383980                | 80785716                | 68750984               | 68016494              | 48045159      | 67689846      |
| Total variants                                                 | 408767                  | 537638                  | 437499                 | 417501                | 312259        | 497203        |
| Variants not common polymorphisms                              | 124007                  | 160764                  | 131919                 | 121868                | 87616         | 177446        |
| Coding changing non common variants                            | 990                     | 1058                    | 988                    | 1026                  | 1010          | 1061          |
| Recessive model variants                                       | 7619                    | 8170                    |                        |                       |               |               |
| Recessive coding changing non common variants                  | 17                      | 22                      |                        |                       |               |               |
| Recessive coding changing non common variants in both patients | 5                       |                         |                        |                       |               |               |



**Supplemental Table 2. Final list of 5 coding changing, non-common recessive variants detected in both affected patients in Family 2**

| <b>Chromosome</b> | <b>Position</b> | <b>Gene</b> | <b>Gene description</b>                               | <b>Mutation</b> | <b>Type</b>                              |
|-------------------|-----------------|-------------|-------------------------------------------------------|-----------------|------------------------------------------|
| 1                 | 47280785        | CYP4B1      | Cytochrome P450, family 4, subfamily B, polypeptide 1 | G/A             | NM_001099772:c.922G>A;<br>p.(Ala308Thr)  |
| 1                 | 45276025        | BTBD19      | BTB (POZ) domain containing 19                        | C/G             | NM_001136537:c.227C>G;<br>p.(Thr76Ser)   |
| 8                 | 145738349       | RECQL4      | RecQ protein-like 4                                   | G/T             | NM_004260: c.2636C>A;<br>p.(Pro879His)   |
| 8                 | 145541756       | DGAT1       | Diacylglycerol O-acyltransferase 1                    | A/G             | NG_034192.1:g.13827T>C                   |
| 8                 | 144789247       | CCDC166     | Coiled-coil domain containing 166                     | C/T             | NM_001162914: c.937G>A;<br>p.(Val313Met) |

Supplemental Table 3. List of DGAT1 variants

| Chromosome | Position  | RSID        | Variant*                               | PolyPhen2         | SIFT      | Allele Frequency | Annotation      | Allele Count | Allele Number | Number of Homozygotes |
|------------|-----------|-------------|----------------------------------------|-------------------|-----------|------------------|-----------------|--------------|---------------|-----------------------|
| 8          | 145550151 | .           | NM_012079.5:c.149C>T;<br>p.(Ala50Val)  | Benign            | Tolerated | 0.001456         | missense        | 2            | 1374          | 0                     |
| 8          | 145545073 | rs145303862 | NG_034192.1(DGAT1):c.<br>201-2A>G      |                   |           | 0.000008284      | splice acceptor | 1            | 120716        | 0                     |
| 8          | 145545068 | .           | NM_012079.5:c.204C>A;<br>p.(Cys68Ter)  |                   |           | 0.000008282      | stop gained     | 1            | 120748        | 0                     |
| 8          | 145545064 | .           | NM_012079.5:c.208C>T;<br>p.(Arg70Cys)  | Probably damaging | Damaging  | 0.00000828       | missense        | 1            | 120780        | 0                     |
| 8          | 145545063 | .           | NM_012079.5:c.209G>A;<br>p.(Arg70His)  | Benign            | Damaging  | 0.000008277      | missense        | 1            | 120814        | 0                     |
| 8          | 145545024 | .           | NM_012079.5:c.248G>A;<br>p.(Ser83Asn)  | Benign            | Tolerated | 0.00001652       | missense        | 2            | 121052        | 0                     |
| 8          | 145545017 | .           | NM_012079.5:c.255C>G;<br>p.(Tyr85Ter)  |                   |           | 0.000008258      | stop gained     | 1            | 121094        | 0                     |
| 8          | 145545010 | rs189862978 | NM_012079.5:c.262A>G;<br>p.(Ile88Val)  | Benign            | Tolerated | 0.00004954       | missense        | 6            | 121108        | 0                     |
| 8          | 145544994 | .           | NM_012079.5:c.278T>C;<br>p.(Val93Ala)  | Probably damaging | Damaging  | 0.000008255      | missense        | 1            | 121144        | 0                     |
| 8          | 145544982 | .           | NG_034192.1(DGAT1):c.<br>288+1delG     |                   |           | 0.000008256      | splice donor    | 1            | 121126        | 0                     |
| 8          | 145542719 | .           | NM_012079.5:c.301G>A;<br>p.(Ala101Thr) | Possibly damaging | Tolerated | 0.00004498       | missense        | 1            | 22234         | 0                     |
| 8          | 145542716 | .           | NM_012079.5:c.304C>T;<br>p.(Arg102Trp) | Probably damaging | Damaging  | 0.00004464       | missense        | 1            | 22400         | 0                     |
| 8          | 145542706 | .           | NM_012079.5:c.314T>C;<br>p.(Leu105Pro) | Probably damaging | Damaging  | 0.00004342       | missense        | 1            | 23030         | 0                     |
| 8          | 145542581 | .           | NM_012079.5:c.332A>G;<br>p.(Tyr111Cys) | Probably damaging | Damaging  | 0.0000216        | missense        | 2            | 92614         | 0                     |
| 8          | 145542532 | .           | NM_012079.5:c.381T>G;<br>p.(Asp127Glu) | Probably damaging | Tolerated | 0.0000191        | missense        | 2            | 104718        | 0                     |
| 8          | 145542530 | .           | NM_012079.5:c.383C>T;<br>p.(Pro128Leu) | Probably damaging | Tolerated | 0.000009574      | missense        | 1            | 104450        | 0                     |
| 8          | 145542530 | .           | NM_012079.5:c.383C>A;<br>p.(Pro128His) | Probably damaging | Tolerated | 0.000009574      | missense        | 1            | 104450        | 0                     |
| 8          | 145542525 | .           | NM_012079.5:c.388A>G;<br>p.(Ser130Gly) | Possibly damaging | Tolerated | 0.000009589      | missense        | 1            | 104282        | 0                     |
| 8          | 145542516 | .           | NM_012079.5:c.397G>A;<br>p.(Ala133Thr) | Possibly damaging | Tolerated | 0.00002929       | missense        | 3            | 102436        | 0                     |
| 8          | 145542500 | .           | NM_012079.5:c.413T>C;<br>p.(Ile138Thr) | Possibly damaging | Tolerated | 0.00002021       | missense        | 2            | 98962         | 0                     |

|          |                  |             |                                                                    |                              |                 |                    |                      |           |               |          |
|----------|------------------|-------------|--------------------------------------------------------------------|------------------------------|-----------------|--------------------|----------------------|-----------|---------------|----------|
| 8        | 145542414        | rs140443241 | NM_012079.5:c.416C>T;<br>p.(Ala139Val)                             | Benign                       | Tolerated       | 0.00004594         | missense             | 4         | 87066         | 0        |
| 8        | 145542411        | .           | NM_012079.5:c.419C>T;<br>p.(Ala140Val)                             | Benign                       | Tolerated       | 0.00005686         | missense             | 5         | 87940         | 0        |
| 8        | 145542408        | rs150538509 | NM_012079.5:c.422A>G;<br>p.(Asn141Ser)                             | Probably<br>damaging         | Tolerated       | 0.0000567          | missense             | 5         | 88178         | 0        |
| <b>8</b> | <b>145542387</b> | .           | <b>NM_012079.5:c.443T&gt;G;<br/>p.(Phe148Cys)</b>                  | <b>Probably<br/>damaging</b> | <b>Damaging</b> | <b>0.0001117</b>   | <b>missense</b>      | <b>10</b> | <b>89532</b>  | <b>0</b> |
| 8        | 145542375        | rs55907012  | NM_012079.5:c.455A>G;<br>p.(Lys152Arg)                             | Benign                       | Tolerated       | 0.0164             | missense             | 1482      | 90390         | 20       |
| 8        | 145542372        | .           | NM_012079.5:c.458G>T;<br>p.(Arg153Leu)                             | Benign                       | Tolerated       | 0.00001108         | missense             | 1         | 90246         | 0        |
| <b>8</b> | <b>145542371</b> | .           | <b>NM_012079.5:c.458delG;<br/>p.(Arg153ProfsTer7)</b>              |                              |                 | <b>0.00001104</b>  | <b>frameshift</b>    | <b>1</b>  | <b>90576</b>  | <b>0</b> |
| 8        | 145542366        | .           | NM_012079.5:c.464C>T;<br>p.(Ala155Val)                             | Possibly<br>damaging         | Tolerated       | 0.00006645         | missense             | 6         | 90294         | 0        |
| 8        | 145542364        | .           | NM_012079.5:c.466G>A;<br>p.(Val156Met)                             | Benign                       | Tolerated       | 0.000022           | missense             | 2         | 90908         | 0        |
| <b>8</b> | <b>145542219</b> | .           | <b>NM_012079.5:c.479C&gt;T;<br/>p.(Thr160Met)</b>                  | <b>Probably<br/>damaging</b> | <b>Damaging</b> | <b>0.0000937</b>   | <b>missense</b>      | <b>10</b> | <b>106720</b> | <b>0</b> |
| 8        | 145542210        | .           | NM_012079.5:c.488C>T;<br>p.(Ala163Val)                             | Benign                       | Tolerated       | 0.00002772         | missense             | 3         | 108228        | 0        |
| <b>8</b> | <b>145542204</b> | .           | <b>NM_012079.5:c.493delC;<br/>p.(Leu165CysfsTer34)</b>             |                              |                 | <b>0.000009161</b> | <b>frameshift</b>    | <b>1</b>  | <b>109156</b> | <b>0</b> |
| 8        | 145542196        | .           | NM_012079.5:c.502C>T;<br>p.(His168Tyr)                             | Benign                       | Tolerated       | 0.000009071        | missense             | 1         | 110238        | 0        |
| 8        | 145542193        | rs144065666 | NM_012079.5:c.505G>A;<br>p.(Val169Met)                             | Benign                       | Tolerated       | 0.0002085          | missense             | 23        | 110330        | 0        |
| 8        | 145542184        | .           | NM_012079.5:c.514C>G;<br>p.(Leu172Val)                             | Benign                       | Tolerated       | 0.000008996        | missense             | 1         | 111156        | 0        |
| <b>8</b> | <b>145542166</b> | .           | <b>NM_012079.5:c.530_531del<br/>e1GT;<br/>p.(Cys177PhefsTer10)</b> |                              |                 | <b>0.000008957</b> | <b>frameshift</b>    | <b>1</b>  | <b>111648</b> | <b>0</b> |
| 8        | 145542160        | .           | NM_012079.5:c.538G>T;<br>p.(Ala180Ser)                             | Benign                       | Tolerated       | 0.00001798         | missense             | 2         | 111246        | 0        |
| 8        | 145542159        | rs139015645 | NM_012079.5:c.539C>T;<br>p.(Ala180Val)                             | Benign                       | Tolerated       | 0.00002701         | missense             | 3         | 111086        | 0        |
| 8        | 145542155        | .           | NM_012079.5:c.540_542dupGGC;<br>p.(Ala181dup)                      |                              |                 | 0.00007227         | inframe<br>insertion | 8         | 110692        | 0        |
| 8        | 145542144        | .           | NM_012079.5:c.554T>C;<br>p.(Leu185Pro)                             | Possibly<br>damaging         | Tolerated       | 0.000009138        | missense             | 1         | 109438        | 0        |
| 8        | 145542133        | .           | NM_012079.5:c.565A>G;<br>p.(Ile189Val)                             | Benign                       | Tolerated       | 0.00001856         | missense             | 2         | 107744        | 0        |
| 8        | 145542129        | .           | NM_012079.5:c.569C>T;<br>p.(Thr190Ile)                             | Probably<br>damaging         | Tolerated       | 0.00002805         | missense             | 3         | 106934        | 0        |

|          |                  |                    |                                                         |                              |                 |                    |                     |          |               |          |
|----------|------------------|--------------------|---------------------------------------------------------|------------------------------|-----------------|--------------------|---------------------|----------|---------------|----------|
| 8        | 145542001        | .                  | NM_012079.5:c.599C>T;<br>p.(Ala200Val)                  | Benign                       | Tolerated       | 0.00005194         | missense            | 6        | 115522        | 0        |
| <b>8</b> | <b>145541995</b> | .                  | <b>NM_012079.5:c.605C&gt;A;</b><br><b>p.(Thr202Asn)</b> | <b>Probably<br/>damaging</b> | <b>Damaging</b> | <b>0.00002573</b>  | <b>missense</b>     | <b>3</b> | <b>116602</b> | <b>0</b> |
| 8        | 145541993        | .                  | NM_012079.5:c.607A>G;<br>p.(Ile203Val)                  | Benign                       | Tolerated       | 0.000008567        | missense            | 1        | 116722        | 0        |
| 8        | 145541990        | .                  | NM_012079.5:c.610C>T;<br>p.(Leu204Phe)                  | Probably<br>damaging         | Tolerated       | 0.00005135         | missense            | 6        | 116852        | 0        |
| 8        | 145541974        | rs142970193        | NM_012079.5:c.626T>C;<br>p.(Phe209Ser)                  | Benign                       | Tolerated       | 0.00005954         | missense            | 7        | 117566        | 0        |
| <b>8</b> | <b>145541971</b> | <b>rs138248019</b> | <b>NM_012079.5:c.629C&gt;T;</b><br><b>p.(Ser210Phe)</b> | <b>Probably<br/>damaging</b> | <b>Damaging</b> | <b>0.000008502</b> | <b>missense</b>     | <b>1</b> | <b>117624</b> | <b>0</b> |
| 8        | 145541968        | .                  | NM_012079.5:c.629_631de<br>ICCT; p.(Ser210del)          |                              |                 | 0.00007649         | inframe<br>deletion | 9        | 117664        | 0        |
| 8        | 145541966        | rs150434452        | NM_012079.5:c.634C>G;<br>p.(Arg212Gly)                  | Benign                       | Tolerated       | 0.000008501        | missense            | 1        | 117628        | 0        |
| 8        | 145541966        | rs150434452        | NM_012079.5:c.634C>T;<br>p.(Arg212Cys)                  | Probably<br>damaging         | Tolerated       | 0.000136           | missense            | 16       | 117628        | 0        |
| 8        | 145541965        | .                  | NM_012079.5:c.635G>A;<br>p.(Arg212His)                  | Possibly<br>damaging         | Tolerated       | 0.000008501        | missense            | 1        | 117634        | 0        |
| 8        | 145541963        | .                  | NM_012079.5:c.637G>A;<br>p.(Asp213Asn)                  | Possibly<br>damaging         | Tolerated       | 0.000017           | missense            | 2        | 117664        | 0        |
| 8        | 145541960        | .                  | NM_012079.5:c.640G>A;<br>p.(Val214Ile)                  | Probably<br>damaging         | Tolerated       | 0.0001616          | missense            | 19       | 117602        | 0        |
| <b>8</b> | <b>145541950</b> | .                  | <b>NM_012079.5:c.650G&gt;A;</b><br><b>p.(Trp217Ter)</b> |                              |                 | <b>0.000008506</b> | <b>stop gained</b>  | <b>1</b> | <b>117558</b> | <b>0</b> |
| <b>8</b> | <b>145541947</b> | .                  | <b>NM_012079.5:c.653G&gt;T;</b><br><b>p.(Cys218Phe)</b> | <b>Probably<br/>damaging</b> | <b>Damaging</b> | <b>0.000008511</b> | <b>missense</b>     | <b>1</b> | <b>117498</b> | <b>0</b> |
| <b>8</b> | <b>145541945</b> | .                  | <b>NM_012079.5:c.655C&gt;T;</b><br><b>p.(Arg219Cys)</b> | <b>Probably<br/>damaging</b> | <b>Damaging</b> | <b>0.00003407</b>  | <b>missense</b>     | <b>4</b> | <b>117394</b> | <b>0</b> |
| <b>8</b> | <b>145541944</b> | .                  | <b>NM_012079.5:c.656G&gt;A;</b><br><b>p.(Arg219His)</b> | <b>Probably<br/>damaging</b> | <b>Damaging</b> | <b>0.00001704</b>  | <b>missense</b>     | <b>2</b> | <b>117346</b> | <b>0</b> |
| 8        | 145541942        | .                  | NM_012079.5:c.658A>G;<br>p.(Arg220Gly)                  | Benign                       | Tolerated       | 0.00003409         | missense            | 4        | 117320        | 0        |
| 8        | 145541930        | .                  | NM_012079.5:c.670A>G;<br>p.(Lys224Glu)                  | Benign                       | Tolerated       | 0.000008553        | missense            | 1        | 116916        | 0        |
| <b>8</b> | <b>145541923</b> | .                  | <b>NG_034192.1(DGAT1):c.</b><br><b>676+1G&gt;A</b>      |                              |                 | <b>0.00001715</b>  | <b>splice donor</b> | <b>2</b> | <b>116618</b> | <b>0</b> |
| 8        | 145541829        | .                  | NM_012079.5:c.680C>T;<br>p.(Ser227Phe)                  | Possibly<br>damaging         | Damaging        | 0.000008756        | missense            | 1        | 114210        | 0        |
| 8        | 145541818        | .                  | NM_012079.5:c.691A>G;<br>p.(Lys231Glu)                  | Benign                       | Tolerated       | 0.00001774         | missense            | 2        | 112768        | 0        |
| 8        | 145541817        | .                  | NM_012079.5:c.692A>C;<br>p.(Lys231Thr)                  | Possibly<br>damaging         | Tolerated       | 0.000008877        | missense            | 1        | 112646        | 0        |

|   |           |             |                                                            |                      |           |             |                     |      |        |     |
|---|-----------|-------------|------------------------------------------------------------|----------------------|-----------|-------------|---------------------|------|--------|-----|
| 8 | 145541815 | .           | NM_012079.5:c.691_694de<br>1AAGGinsAAGA;<br>p.(Ala232Thr)  | Possibly<br>damaging | Tolerated | 0.000107    | missense            | 12   | 112170 | 0   |
| 8 | 145541815 | .           | NM_012079.5:c.691_694de<br>1AAGGinsG; p.(Lys231del)        |                      |           | 0.000008915 | inframe<br>deletion | 1    | 112170 | 0   |
| 8 | 145541812 | .           | NM_012079.5:c.697A>G;<br>p.(Ser233Gly)                     | Benign               | Tolerated | 0.000008939 | missense            | 1    | 111874 | 0   |
| 8 | 145541805 | .           | NM_012079.5:c.704C>T;<br>p.(Ala235Val)                     | Benign               | Tolerated | 0.000009016 | missense            | 1    | 110916 | 0   |
| 8 | 145541796 | .           | NM_012079.5:c.713C>T;<br>p.(Pro238Leu)                     | Benign               | Tolerated | 0.0002813   | missense            | 31   | 110204 | 0   |
| 8 | 145541788 | .           | NM_012079.5:c.721G>A;<br>p.(Val241Met)                     | Probably<br>damaging | Damaging  | 0.00001822  | missense            | 2    | 109788 | 0   |
| 8 | 145541784 | .           | NM_012079.5:c.725G>A;<br>p.(Ser242Asn)                     | Possibly<br>damaging | Tolerated | 0.000009117 | missense            | 1    | 109682 | 0   |
| 8 | 145541782 | rs146322937 | NM_012079.5:c.727T>C;<br>p.(Tyr243His)                     | Probably<br>damaging | Damaging  | 0.00006384  | missense            | 7    | 109656 | 0   |
| 8 | 145541778 | .           | NM_012079.5:c.731C>T;<br>p.(Pro244Leu)                     | Probably<br>damaging | Damaging  | 0.000009124 | missense            | 1    | 109600 | 0   |
| 8 | 145541772 | .           | NM_012079.5:c.737A>G;<br>p.(Asn246Ser)                     | Possibly<br>damaging | Damaging  | 0.000009129 | missense            | 1    | 109546 | 0   |
| 8 | 145541766 | rs55962377  | NM_012079.5:c.743C>A;<br>p.(Thr248Asn)                     | Benign               | Tolerated | 0.06813     | missense            | 7464 | 109560 | 347 |
| 8 | 145541761 | rs144473757 | NM_012079.5:c.748C>T;<br>p.(Arg250Cys)                     | Benign               | Damaging  | 0.000192    | missense            | 21   | 109400 | 0   |
| 8 | 145541760 | .           | NM_012079.5:c.749G>T;<br>p.(Arg250Leu)                     | Benign               | Tolerated | 0.00002743  | missense            | 3    | 109350 | 0   |
| 8 | 145541760 | .           | NM_012079.5:c.749G>A;<br>p.(Arg250His)                     | Probably<br>damaging | Tolerated | 0.000009145 | missense            | 1    | 109350 | 0   |
| 8 | 145541758 | .           | NM_012079.5:c.751G>A;<br>p.(Asp251Asn)                     | Probably<br>damaging | Tolerated | 0.00003659  | missense            | 4    | 109312 | 0   |
| 8 | 145541756 | rs148665132 | NG_034192.1(DGAT1):c.<br>751+2T>C;<br>p.(Ala226_Arg250del) |                      |           | 0.0001098   | splice donor        | 12   | 109286 | 0   |
| 8 | 145541678 | .           | NM_012079.5:c.754C>T;<br>p.(Leu252Phe)                     | Probably<br>damaging | Damaging  | 0.000009213 | missense            | 1    | 108544 | 0   |
| 8 | 145541669 | .           | NM_012079.5:c.763T>C;<br>p.(Phe255Leu)                     | Probably<br>damaging | Damaging  | 0.000009221 | missense            | 1    | 108450 | 0   |
| 8 | 145541668 | .           | NM_012079.5:c.764T>A;<br>p.(Phe255Tyr)                     | Probably<br>damaging | Damaging  | 0.000009222 | missense            | 1    | 108438 | 0   |
| 8 | 145541660 | rs144983092 | NM_012079.5:c.772G>A;<br>p.(Ala258Thr)                     | Probably<br>damaging | Damaging  | 0.00007386  | missense            | 8    | 108318 | 0   |
| 8 | 145541653 | .           | NM_012079.5:c.779C>A;<br>p.(Thr260Asn)                     | Probably<br>damaging | Damaging  | 0.000009235 | missense            | 1    | 108278 | 0   |

|   |           |             |                                        |                      |           |             |                    |     |        |   |
|---|-----------|-------------|----------------------------------------|----------------------|-----------|-------------|--------------------|-----|--------|---|
| 8 | 145541635 | rs146196839 | NM_012079.5:c.797A>G;<br>p.(Asn266Ser) | Probably<br>damaging | Tolerated | 0.001988    | missense           | 215 | 108160 | 2 |
| 8 | 145541630 | rs141523495 | NM_012079.5:c.802C>T;<br>p.(Pro268Ser) | Possibly<br>damaging | Damaging  | 0.0000185   | missense           | 2   | 108104 | 0 |
| 8 | 145541627 | .           | NM_012079.5:c.805C>T;<br>p.(Arg269Cys) | Probably<br>damaging | Damaging  | 0.00002777  | missense           | 3   | 108026 | 0 |
| 8 | 145541626 | rs139792712 | NM_012079.5:c.806G>A;<br>p.(Arg269His) | Probably<br>damaging | Damaging  | 0.00008334  | missense           | 9   | 107992 | 0 |
| 8 | 145541623 | .           | NM_012079.5:c.809C>A;<br>p.(Ser270Tyr) | Possibly<br>damaging | Damaging  | 0.00002779  | missense           | 3   | 107946 | 0 |
| 8 | 145541620 | .           | NM_012079.5:c.812C>T;<br>p.(Pro271Leu) | Benign               | Tolerated | 0.00000927  | missense           | 1   | 107876 | 0 |
| 8 | 145541618 | .           | NM_012079.5:c.814C>T;<br>p.(Arg272Cys) | Probably<br>damaging | Damaging  | 0.00002783  | missense           | 3   | 107814 | 0 |
| 8 | 145541614 | .           | NM_012079.5:c.818T>C;<br>p.(Ile273Thr) | Probably<br>damaging | Damaging  | 0.00001856  | missense           | 2   | 107760 | 0 |
| 8 | 145541613 | rs146155230 | NM_012079.5:c.819C>G;<br>p.(Ile273Met) | Probably<br>damaging | Damaging  | 0.00002784  | missense           | 3   | 107742 | 0 |
| 8 | 145541612 | .           | NM_012079.5:c.820C>T;<br>p.(Arg274Trp) | Probably<br>damaging | Damaging  | 0.00001857  | missense           | 2   | 107678 | 0 |
| 8 | 145541611 | .           | NM_012079.5:c.821G>A;<br>p.(Arg274Gln) | Probably<br>damaging | Damaging  | 0.000009285 | missense           | 1   | 107704 | 0 |
| 8 | 145541607 | .           | NM_012079.5:c.825G>C;<br>p.(Lys275Asn) | Probably<br>damaging | Tolerated | 0.000009295 | missense           | 1   | 107590 | 0 |
| 8 | 145541606 | .           | NM_012079.5:c.826C>T;<br>p.(Arg276Cys) | Probably<br>damaging | Damaging  | 0.0000186   | missense           | 2   | 107536 | 0 |
| 8 | 145541593 | .           | NM_012079.5:c.839G>A;<br>p.(Arg280Gln) | Probably<br>damaging | Damaging  | 0.000009339 | missense           | 1   | 107080 | 0 |
| 8 | 145541591 | .           | NM_012079.5:c.841C>T;<br>p.(Arg281Trp) | Probably<br>damaging | Damaging  | 0.00000935  | missense           | 1   | 106950 | 0 |
| 8 | 145541590 | .           | NM_012079.5:c.842G>A;<br>p.(Arg281Gln) | Probably<br>damaging | Tolerated | 0.00003744  | missense           | 4   | 106836 | 0 |
| 8 | 145541473 | .           | NM_012079.5:c.868C>G;<br>p.(Gln290Glu) | Probably<br>damaging | Tolerated | 0.000008965 | missense           | 1   | 111544 | 0 |
| 8 | 145541464 | .           | NM_012079.5:c.877G>A;<br>p.(Val293Met) | Possibly<br>damaging | Tolerated | 0.000008871 | missense           | 1   | 112724 | 0 |
| 8 | 145541457 | This study  | NM_012079.5:c.884T>C;<br>p.(Leu295Pro) | Probably<br>damaging | Damaging  |             |                    |     |        |   |
| 8 | 145541376 | .           | NG_034192.1(DGAT1):c.<br>895-1G>A; p.? |                      |           | 0.000008277 | splice<br>acceptor | 1   | 120814 | 0 |
| 8 | 145541359 | .           | NM_012079.5:c.911T>C;<br>p.(Ile304Thr) | Possibly<br>damaging | Damaging  | 0.000008289 | missense           | 1   | 120638 | 0 |
| 8 | 145541252 | .           | NG_034192.1(DGAT1):c.<br>937-1G>A; p.? |                      |           | 0.00002474  | splice<br>acceptor | 3   | 121278 | 0 |



|   |           |             |                                                             |                      |           |             |                     |    |        |   |
|---|-----------|-------------|-------------------------------------------------------------|----------------------|-----------|-------------|---------------------|----|--------|---|
| 8 | 145541251 | .           | NM_012079.5:c.937G>T;<br>p.(Asp313Tyr)                      | Possibly<br>damaging | Damaging  | 0.000008246 | missense            | 1  | 121278 | 0 |
| 8 | 145541236 | .           | NM_012079.5:c.952C>T;<br>p.(Arg318Cys)                      | Probably<br>damaging | Tolerated | 0.00004947  | missense            | 6  | 121288 | 1 |
| 8 | 145541227 | .           | NM_012079.5:c.961G>A;<br>p.(Glu321Lys)                      | Probably<br>damaging | Damaging  | 0.0001649   | missense            | 20 | 121282 | 0 |
| 8 | 145541224 | .           | NM_012079.5:c.964C>T;<br>p.(Arg322Cys)                      | Probably<br>damaging | Damaging  | 0.00001649  | missense            | 2  | 121276 | 0 |
| 8 | 145541211 | .           | NM_012079.5:c.977T>A;<br>p.(Leu326Gln)                      | Probably<br>damaging | Damaging  | 0.00001649  | missense            | 2  | 121270 | 0 |
| 8 | 145541206 | .           | NG_034192.1(DGAT1):c.<br>981+1G>T; p.?                      |                      |           | 0.000008246 | splice donor        | 1  | 121266 | 0 |
| 8 | 145541087 | .           | NM_012079.5:c.1003C>T;<br>p.(Leu335Phe)                     | Probably<br>damaging | Damaging  | 0.00000826  | missense            | 1  | 121062 | 0 |
| 8 | 145541084 | .           | NM_012079.5:c.1006A>G;<br>p.(Ile336Val)                     | Benign               | Tolerated | 0.00001652  | missense            | 2  | 121060 | 0 |
| 8 | 145541081 | .           | NM_012079.5:c.1009T>A;<br>p.(Phe337Ile)                     | Probably<br>damaging | Tolerated | 0.00003304  | missense            | 4  | 121050 | 0 |
| 8 | 145541079 | rs149384210 | NM_012079.5:c.1011C>G;<br>p.(Phe337Leu)                     | Possibly<br>damaging | Tolerated | 0.00000826  | missense            | 1  | 121064 | 0 |
| 8 | 145541074 | .           | NM_012079.5:c.1013_101<br>6delTCTAinsTCTT;<br>p.(Tyr339Phe) | Probably<br>damaging | Tolerated | 0.000008261 | missense            | 1  | 121046 | 0 |
| 8 | 145541074 | .           | NM_012079.5:c.1013_101<br>6delTCTAinsA;<br>p.(Phe338del)    |                      |           | 0.00002478  | inframe<br>deletion | 3  | 121046 | 0 |
| 8 | 145541070 | .           | NM_012079.5:c.1020G>A<br>; p.(Trp340Ter)                    |                      |           | 0.00004957  | stop gained         | 6  | 121036 | 0 |
| 8 | 145541045 | .           | NM_012079.5:c.1045G>A;<br>p.(Val349Met)                     | Possibly<br>damaging | Tolerated | 0.000008265 | missense            | 1  | 120996 | 0 |
| 8 | 145541029 | .           | NM_012079.5:c.1061A>G;<br>p.(Gln354Arg)                     | Benign               | Tolerated | 0.00001653  | missense            | 2  | 120968 | 0 |
| 8 | 145541017 | .           | NM_012079.5:c.1073G>A<br>; p.(Arg358Gln)                    | Probably<br>damaging | Damaging  | 0.00003307  | missense            | 4  | 120940 | 0 |
| 8 | 145541008 | .           | NM_012079.5:c.1082A>G<br>; p.(Tyr361Cys)                    | Probably<br>damaging | Damaging  | 0.00000827  | missense            | 1  | 120924 | 0 |
| 8 | 145541006 | .           | NM_012079.5:c.1084C>T;<br>p.(Arg362Trp)                     | Probably<br>damaging | Damaging  | 0.00002481  | missense            | 3  | 120916 | 0 |
| 8 | 145541005 | rs138800445 | NM_012079.5:c.1085G>A;<br>p.(Arg362Gln)                     | Possibly<br>damaging | Tolerated | 0.00001654  | missense            | 2  | 120900 | 0 |
| 8 | 145540902 | .           | NM_012079.5:c.1108G>A;<br>p.(Val370Ile)                     | Benign               | Tolerated | 0.000008308 | missense            | 1  | 120372 | 0 |
| 8 | 145540898 | .           | NM_012079.5:c.1112C>T;<br>p.(Thr371Ile)                     | Benign               | Damaging  | 0.000008303 | missense            | 1  | 120438 | 0 |

|   |           |             |                                                           |                      |           |             |             |   |        |   |
|---|-----------|-------------|-----------------------------------------------------------|----------------------|-----------|-------------|-------------|---|--------|---|
| 8 | 145540890 | .           | NM_012079.5:c.1120T>A;<br>p.(Trp374Arg)                   | Probably<br>damaging | Damaging  | 0.000008304 | missense    | 1 | 120428 | 0 |
| 8 | 145540887 | .           | NM_012079.5:c.1123C>T;<br>p.(Gln375Ter)                   |                      |           | 0.000008306 | stop gained | 1 | 120390 | 0 |
| 8 | 145540881 | .           | NM_012079.5:c.1129T>C;<br>p.(Trp377Arg)                   | Probably<br>damaging | Damaging  | 0.000008303 | missense    | 1 | 120438 | 0 |
| 8 | 145540871 | rs146441969 | NM_012079.5:c.1139C>T;<br>p.(Pro380Leu)                   | Probably<br>damaging | Damaging  | 0.000008312 | missense    | 1 | 120314 | 0 |
| 8 | 145540868 | .           | NM_012079.5:c.1142T>C;<br>p.(Val381Ala)                   | Probably<br>damaging | Damaging  | 0.00000831  | missense    | 1 | 120336 | 0 |
| 8 | 145540856 | .           | NM_012079.5:c.1154G>A<br>; p.(Cys385Tyr)                  | Probably<br>damaging | Damaging  | 0.000008312 | missense    | 1 | 120306 | 0 |
| 8 | 145540771 | .           | NM_012079.5:c.1162C>T;<br>p.(His388Tyr)                   | Probably<br>damaging | Damaging  | 0.00001657  | missense    | 2 | 120684 | 0 |
| 8 | 145540765 | .           | NM_012079.5:c.1168T>C;<br>p.(Tyr390His)                   | Probably<br>damaging | Damaging  | 0.00002486  | missense    | 3 | 120664 | 0 |
| 8 | 145540750 | .           | NM_012079.5:c.1183C>T;<br>p.(Arg395Ter)                   |                      |           | 0.000008293 | stop gained | 1 | 120580 | 0 |
| 8 | 145540749 | .           | NM_012079.5:c.1184G>A;<br>p.(Arg395Gln)                   | Benign               | Tolerated | 0.00002488  | missense    | 3 | 120570 | 0 |
| 8 | 145540749 | .           | NM_012079.5:c.1184G>C<br>; p.(Arg395Pro)                  | Probably<br>damaging | Damaging  | 0.00001659  | missense    | 2 | 120570 | 0 |
| 8 | 145540747 | .           | NM_012079.5:c.1186C>T;<br>p.(Arg396Trp)                   | Probably<br>damaging | Damaging  | 0.00003318  | missense    | 4 | 120558 | 0 |
| 8 | 145540746 | rs193169779 | NM_012079.5:c.1187G>A;<br>p.(Arg396Gln)                   | Benign               | Tolerated | 0.00007465  | missense    | 9 | 120562 | 0 |
| 8 | 145540737 | .           | NM_012079.5:c.1196G>C;<br>p.(Ser399Thr)                   | Benign               | Tolerated | 0.000008298 | missense    | 1 | 120510 | 0 |
| 8 | 145540726 | .           | NM_012079.5:c.1207G>T;<br>p.(Ala403Ser)                   | Possibly<br>damaging | Tolerated | 0.000008304 | missense    | 1 | 120428 | 0 |
| 8 | 145540723 | .           | NM_012079.5:c.1210A>G;<br>p.(Arg404Gly)                   | Benign               | Tolerated | 0.00001661  | missense    | 2 | 120398 | 0 |
| 8 | 145540719 | .           | NM_012079.5:c.1214C>T;<br>p.(Thr405Ile)                   | Benign               | Tolerated | 0.000008309 | missense    | 1 | 120352 | 0 |
| 8 | 145540717 | .           | NM_012079.5:c.1216G>A;<br>p.(Gly406Arg)                   | Possibly<br>damaging | Tolerated | 0.00001662  | missense    | 2 | 120336 | 0 |
| 8 | 145540716 | .           | NM_012079.5:c.1215_121<br>6delAG;<br>p.(Phe408ProfsTer74) |                      |           | 0.00001662  | frameshift  | 2 | 120336 | 0 |
| 8 | 145540713 | .           | NM_012079.5:c.1220T>C;<br>p.(Val407Ala)                   | Probably<br>damaging | Tolerated | 0.000008318 | missense    | 1 | 120226 | 0 |
| 8 | 145540701 | .           | NM_012079.5:c.1232C>T;<br>p.(Ser411Leu)                   | Probably<br>damaging | Damaging  | 0.000008319 | missense    | 1 | 120202 | 0 |
| 8 | 145540694 | .           | NM_012079.5:c.1239C>A;<br>p.(Phe413Leu)                   | Possibly<br>damaging | Tolerated | 0.00001664  | missense    | 2 | 120164 | 0 |

|   |           |             |                                          |                      |           |             |              |   |        |   |
|---|-----------|-------------|------------------------------------------|----------------------|-----------|-------------|--------------|---|--------|---|
| 8 | 145540693 | .           | NM_012079.5:c.1240T>C;<br>p.(Phe414Leu)  | Probably<br>damaging | Tolerated | 0.000008323 | missense     | 1 | 120156 | 0 |
| 8 | 145540691 | .           | NM_012079.5:c.1242C>G;<br>p.(Phe414Leu)  | Probably<br>damaging | Tolerated | 0.000008323 | missense     | 1 | 120142 | 0 |
| 8 | 145540565 | .           | NM_012079.5:c.1262T>A;<br>p.(Val421Asp)  | Probably<br>damaging | Damaging  | 0.00001883  | missense     | 2 | 106222 | 0 |
| 8 | 145540557 | .           | NM_012079.5:c.1270C>T;<br>p.(Arg424Ter)  |                      |           | 0.000009569 | stop gained  | 1 | 104504 | 0 |
| 8 | 145540547 | rs147655123 | NM_012079.5:c.1280G>A;<br>p.(Arg427His)  | Probably<br>damaging | Tolerated | 0.000009797 | missense     | 1 | 102072 | 0 |
| 8 | 145540545 | .           | NM_012079.5:c.1282C>T;<br>p.(Leu428Phe)  | Benign               | Tolerated | 0.000009822 | missense     | 1 | 101814 | 0 |
| 8 | 145540532 | .           | NM_012079.5:c.1295C>T;<br>p.(Thr432Met)  | Benign               | Tolerated | 0.00004096  | missense     | 4 | 97664  | 0 |
| 8 | 145540515 | .           | NG_034192.1(DGAT1):c.<br>1311+1G>A; p.?  |                      |           | 0.00002157  | splice donor | 2 | 92716  | 0 |
| 8 | 145540514 | .           | NG_034192.1(DGAT1):c.<br>1311+2T>C; p.?  |                      |           | 0.00003247  | splice donor | 3 | 92380  | 0 |
| 8 | 145540369 | .           | NM_012079.5:c.1315C>T;<br>p.(Pro439Ser)  | Probably<br>damaging | Damaging  | 0.000009913 | missense     | 1 | 100876 | 0 |
| 8 | 145540359 | .           | NM_012079.5:c.1325G>A<br>; p.(Trp442Ter) |                      |           | 0.00001976  | stop gained  | 2 | 101192 | 0 |
| 8 | 145540354 | .           | NM_012079.5:c.1330G>A;<br>p.(Val444Met)  | Probably<br>damaging | Tolerated | 0.00005952  | missense     | 6 | 100812 | 0 |
| 8 | 145540348 | .           | NM_012079.5:c.1336C>T;<br>p.(Arg446Cys)  | Benign               | Damaging  | 0.00004983  | missense     | 5 | 100342 | 0 |
| 8 | 145540347 | .           | NM_012079.5:c.1337G>T;<br>p.(Arg446Leu)  | Benign               | Damaging  | 0.00003002  | missense     | 3 | 99932  | 0 |
| 8 | 145540347 | .           | NM_012079.5:c.1337G>A<br>; p.(Arg446His) | Probably<br>damaging | Damaging  | 0.00003002  | missense     | 3 | 99932  | 0 |
| 8 | 145540340 | rs140874999 | NM_012079.5:c.1344C>G;<br>p.(Phe448Leu)  | Benign               | Tolerated | 0.00001011  | missense     | 1 | 98898  | 0 |
| 8 | 145540335 | .           | NM_012079.5:c.1349G>T;<br>p.(Gly450Val)  | Probably<br>damaging | Tolerated | 0.0000102   | missense     | 1 | 98006  | 0 |
| 8 | 145540329 | .           | NM_012079.5:c.1355A>G;<br>p.(Tyr452Cys)  | Probably<br>damaging | Tolerated | 0.00001036  | missense     | 1 | 96550  | 0 |
| 8 | 145540326 | .           | NM_012079.5:c.1358G>A<br>; p.(Gly453Asp) | Probably<br>damaging | Damaging  | 0.00001052  | missense     | 1 | 95072  | 0 |
| 8 | 145540310 | .           | NM_012079.5:c.1374G>A<br>; p.(Trp458Ter) |                      |           | 0.00002282  | stop gained  | 2 | 87640  | 0 |
| 8 | 145540302 | .           | NM_012079.5:c.1382T>C;<br>p.(Leu461Pro)  | Probably<br>damaging | Damaging  | 0.00001211  | missense     | 1 | 82552  | 0 |
| 8 | 145540297 | .           | NM_012079.5:c.1387A>G;<br>p.(Ile463Val)  | Benign               | Tolerated | 0.00001245  | missense     | 1 | 80294  | 0 |

|                                                     |           |   |                                           |                      |           |                    |            |     |       |   |
|-----------------------------------------------------|-----------|---|-------------------------------------------|----------------------|-----------|--------------------|------------|-----|-------|---|
| 8                                                   | 145540294 | . | NM_012079.5:c.1390G>A<br>; p.(Gly464Arg)  | Probably<br>damaging | Damaging  | 0.00002579         | missense   | 2   | 77560 | 0 |
| 8                                                   | 145540282 | . | NM_012079.5:c.1402G>A;<br>p.(Ala468Thr)   | Possibly<br>damaging | Tolerated | 0.0000139          | missense   | 1   | 71926 | 0 |
| 8                                                   | 145540279 | . | NM_012079.5:c.1405G>A;<br>p.(Val469Ile)   | Possibly<br>damaging | Tolerated | 0.00004196         | missense   | 3   | 71504 | 0 |
| 8                                                   | 145540267 | . | NM_012079.5:c.1417G>A;<br>p.(Val473Ile)   | Probably<br>damaging | Tolerated | 0.00004565         | missense   | 3   | 65722 | 0 |
| 8                                                   | 145540257 | . | NM_012079.5:c.1427A>G<br>; p.(Tyr476Cys)  | Probably<br>damaging | Damaging  | 0.00001629         | missense   | 1   | 61396 | 0 |
| 8                                                   | 145540249 | . | NM_012079.5:c.1435C>T;<br>p.(Leu479Phe)   | Probably<br>damaging | Tolerated | 0.00003468         | missense   | 2   | 57670 | 0 |
| 8                                                   | 145540240 | . | NM_012079.5:c.1443dupT<br>; p.(Glu482Ter) |                      |           | 0.00001836         | frameshift | 1   | 54452 | 0 |
| 8                                                   | 145540230 | . | NM_012079.5:c.1454C>T;<br>p.(Ala485Val)   | Benign               | Tolerated | 0.005766           | missense   | 281 | 48736 | 7 |
| 8                                                   | 145540224 | . | NM_012079.5:c.1460A>G;<br>p.(Glu487Gly)   | Benign               | Tolerated | 0.00002207         | missense   | 1   | 45310 | 0 |
| 8                                                   | 145540222 | . | NM_012079.5:c.1462G>A;<br>p.(Ala488Thr)   | Benign               | Damaging  | 0.00002263         | missense   | 1   | 44198 | 0 |
| <b>TOTAL:</b>                                       |           |   |                                           |                      |           |                    |            |     |       |   |
| <b>MAF of deleterious missense and null:</b>        |           |   |                                           |                      |           | <b>0.001860985</b> |            |     |       |   |
| <b>Prevalence of deleterious missense and null:</b> |           |   |                                           |                      |           | <b>288744.8552</b> |            |     |       |   |

\*Intronic splice variants are based on genomic reference sequence (GRCh37/Hg19). MAF refers to mean allele frequency. Probably deleterious alleles were based on Polyphen2 (<http://genetics.bwh.harvard.edu/pph2/>) predictions, while the “damaging” alleles were based on SIFT (<http://sift.jcvi.org>) predictions.
